# Supplementary material for: Is history of abuse predictive of eating disorders with binge-eating episodes through an effect mediated by impulsivity? A French longitudinal study
Source: PubMed Central journal article supplement — J Psychiatry Neurosci. 2023 Jan 10;48(1):E13–22. doi: 10.1503/jpn.210218 (PMC9833835; doi:10.1503/jpn.210218), 2023-01-10
Supplement: JPN-210218-at-1.pdf [file JPN-210218-at-1.pdf]

Appendix 1 Cabelguen C, Saillard S, Vanier A, et al. Is history of abuse predictive of eating disorders with binge-eating episodes through an effect mediated by impulsivity? A French longitudinal study. *J Psychiatry Neurosci* 2022. doi: 10.1503/jpn.210218. Copyright © 2022 The Author(s) or their employer(s). To receive this resource in an accessible format, please contact us at [cmajgroup@cmaj.ca](mailto:cmajgroup@cmaj.ca). Online appendices are unedited and posted as supplied by the authors.

|   |                              |         |          |         |
|---|------------------------------|---------|----------|---------|
| - | use of appetite suppressants | 17 (9%) | 28 (13%) | 0.24    |
| - | potomania                    | 14 (8%) | 42 (19%) | < 0.001 |

*Abbreviations: MD: missing data, MINI: mini international neuropsychiatric interview, UPPS-P: urgency, premeditation (lack of), perseverance (lack of), sensation seeking-positive urgency, EVE: French life event questionnaire, BN: bulimia nervosa, AN-BP: anorexia nervosa binge-eating/purging type, BED: binge-eating disorder, BMI: body mass index, NSSI: non-suicidal self-injury.*
